# Supplementary material for: Insights into the Synthesis Parameters Effects on the Structural, Morphological, and Magnetic Properties of Copper Oxide Nanoparticles
Source: MDPI journal article supplement (doi:10.3390/ma16093426), 2023-04-27
Supplement: s1 [file s1]

# Insights into the Synthesis Parameters Effects on the Structural, Morphological, and Magnetic Properties of Copper Oxide Nanoparticles

Fatma Mbarek <sup>1,\*</sup>, Ichraf Chérif <sup>1,2</sup>, Amira Chérif <sup>3</sup>, José María Alonso <sup>4,5</sup>, Irene Morales <sup>4</sup>, Patricia de la Presa <sup>4,6</sup> and Salah Ammar <sup>1</sup>

<sup>1</sup> Electrochemistry, Materials and Environment Research Unit, UREME (UR17ES45), Faculty of Sciences of Gabes, University of Gabes, Gabes 6072, Tunisia; cherif.ichraf@yahoo.fr (I.C.); salah.ammar@fsg.rnu.tn (S.A.)

<sup>2</sup> Higher Institute of Education and Continuous Training of Tunis, Virtual University of Tunis, Tunis 1073, Tunisia

<sup>3</sup> University of Tunis El Manar, Faculty of Sciences of Tunis, Laboratory of Materials Organization and Properties, Tunis 2092, Tunisia; cherifamira3008@gmail.com

<sup>4</sup> Institute of Applied Magnetism, Complutense University of Madrid, A6 22,500 Km, 28230 Las Rozas, Spain; jm.a.r.0@csic.es (J.M.A.); irenemorales@ucm.es (I.M.); pmpresa@ucm.es (P.D.I.P.)

<sup>5</sup> Institute of Materials Sciences of Madrid, CSIC, Sor Juana Ines de la Cruz 3, 28049 Madrid

<sup>6</sup> Department of Material Physics, Complutense University of Madrid, Plaza de la Ciencia 1, 28040 Madrid, Spain

\* Correspondence: fatma.mbarek@fsg.rnu.tn; Tel.: +216-50683270

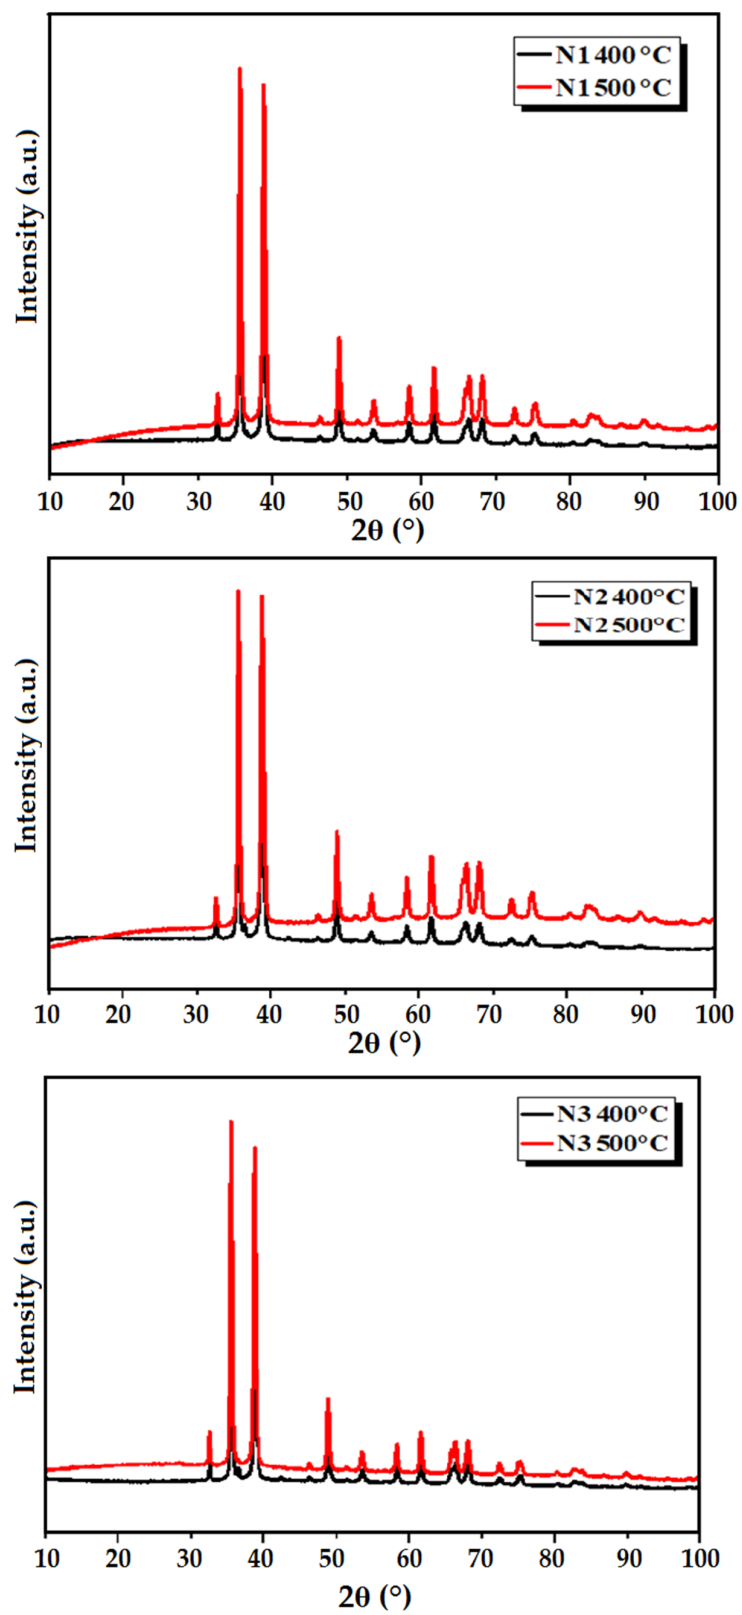

**Figure S1.** XRPD patterns for N1, N2, and N3 samples synthesized at 400 and 500 °C.
